# Supplementary material for: Carbon nano-onions as fluorescent on/off modulated nanoprobes for diagnostics
Source: publisher site journal article supplement (doi:10.3762/bjnano.8.188), 2017-09-07
Supplement: Additional file 1 [file 2190-4286-8-188-S1.pdf]

# Supporting Information

for

## **Carbon nano-onions as fluorescent on/off modulated nanoprobes for diagnostics**

Stefania Lettieri<sup>1</sup>, Marta d'Amora<sup>2</sup>, Adalberto Camisasca<sup>1,3</sup>, Alberto Diaspro<sup>2,4,5</sup> and Silvia Giordani\*<sup>1,6</sup>

Address: <sup>1</sup>Nano Carbon Materials, Istituto Italiano di Tecnologia (IIT), via Livorno 60, 10144, Turin, Italy, <sup>2</sup>Nanoscopy, Istituto Italiano di Tecnologia (IIT), via Morego 30, 16163, Genoa, Italy, <sup>3</sup>Department of Chemistry, University of Genoa, Via Dodecaneso 31, Genoa, 16145, Italy, <sup>4</sup>NIC@IIT, Istituto Italiano di Tecnologia (IIT), Via Morego 30, Genoa, 16163, Italy, <sup>5</sup>Department of Physics, University of Genoa, Via Dodecaneso 33, Genoa, 16145, Italy and <sup>6</sup>Department of Chemistry, University of Turin, via Giuria 7, 10125, Turin, Italy

Email: Silvia Giordani - [silvia.giordani@iit.it](mailto:silvia.giordani@iit.it)

\* Corresponding author

## Additional Experimental Data

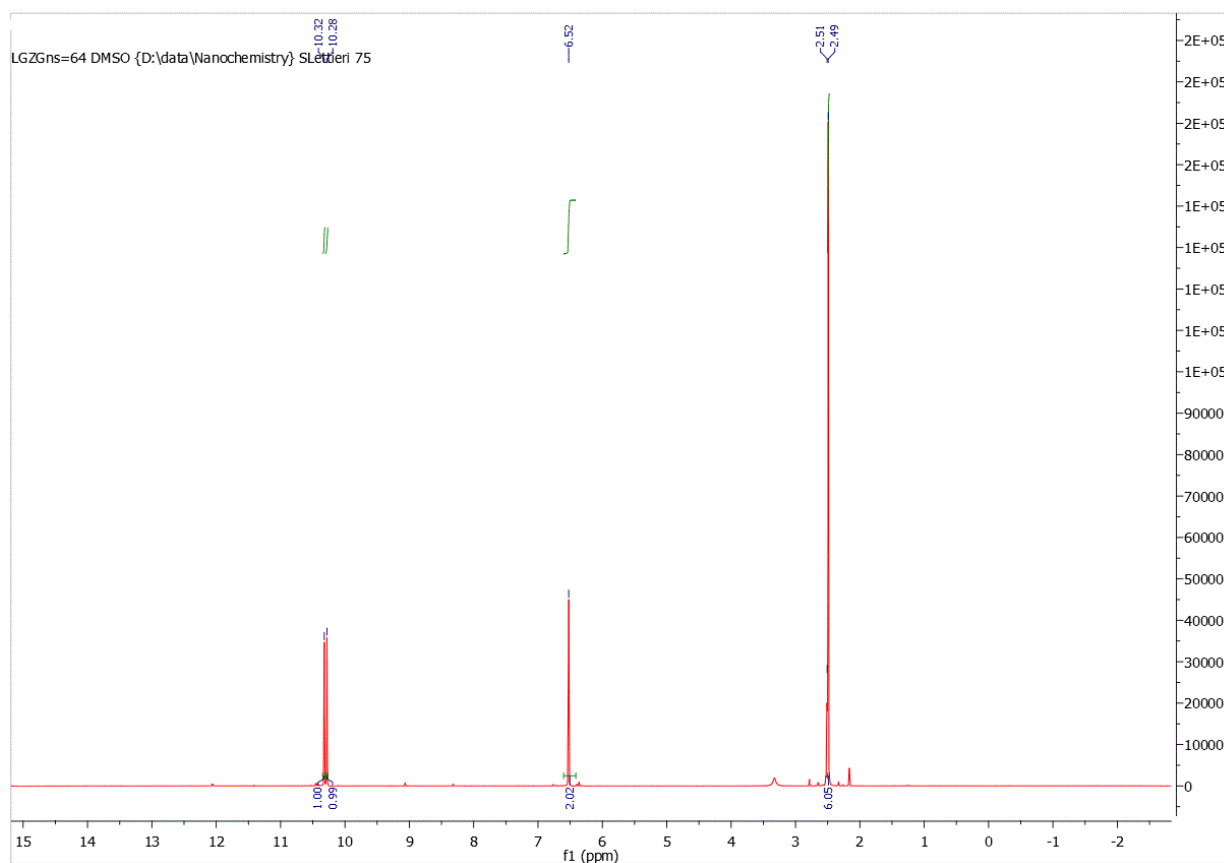

Figure S1:  $^1\text{H}$  NMR spectrum in  $\text{DMSO-}d_6$  of compound **1**.

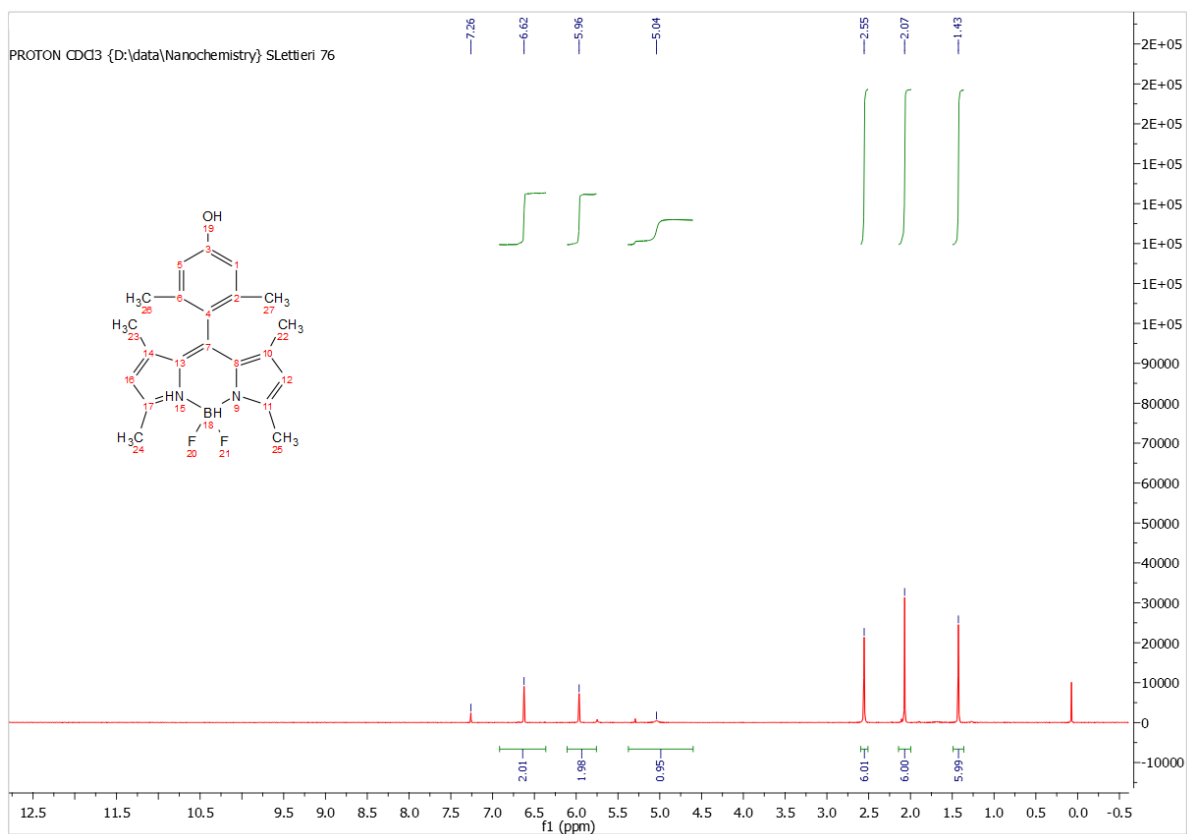

Figure S2: <sup>1</sup>H NMR spectrum in Chloroform-*d* of compound **2**.

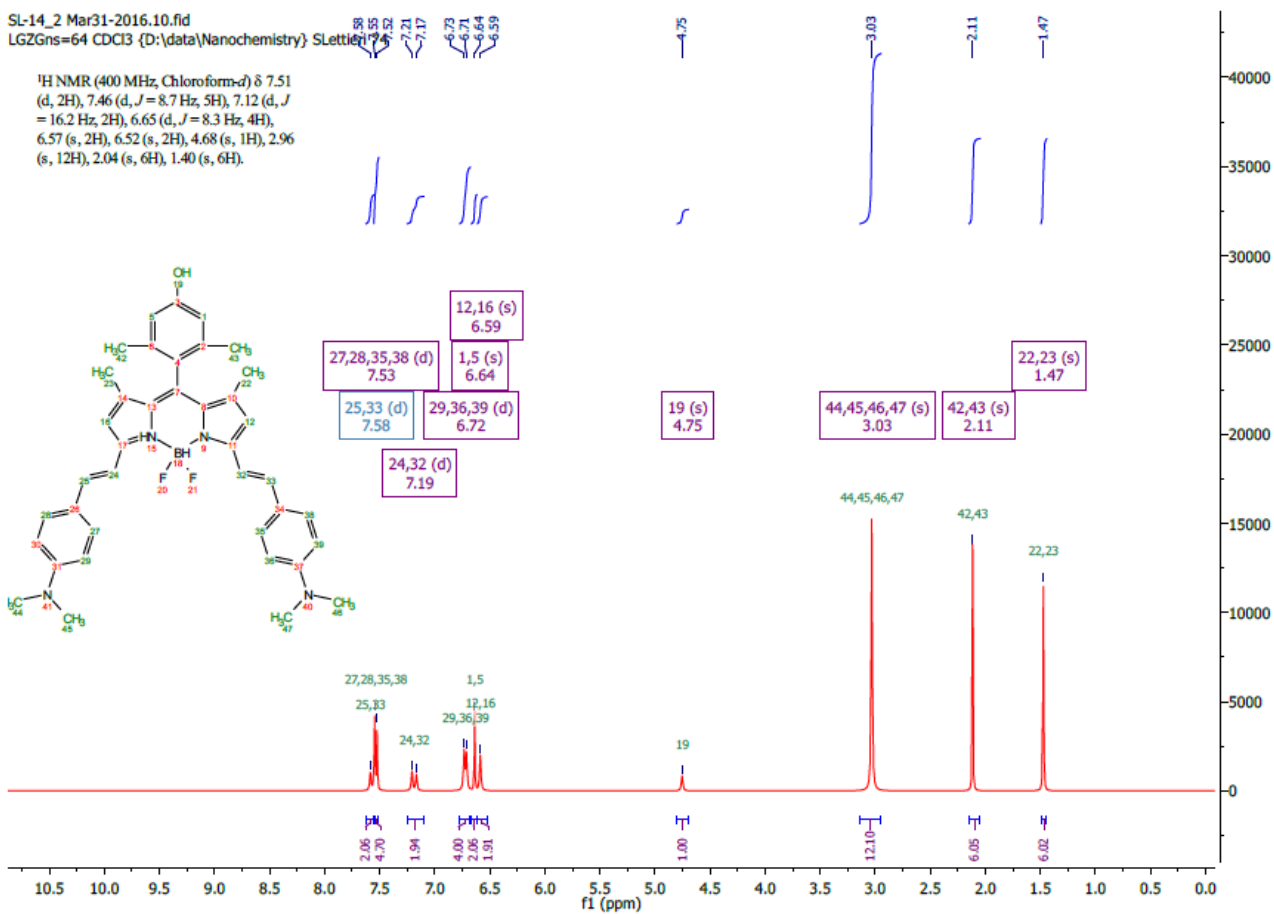

Figure S3: <sup>1</sup>H NMR spectrum in Chloroform-*d* of BODIPY 3.

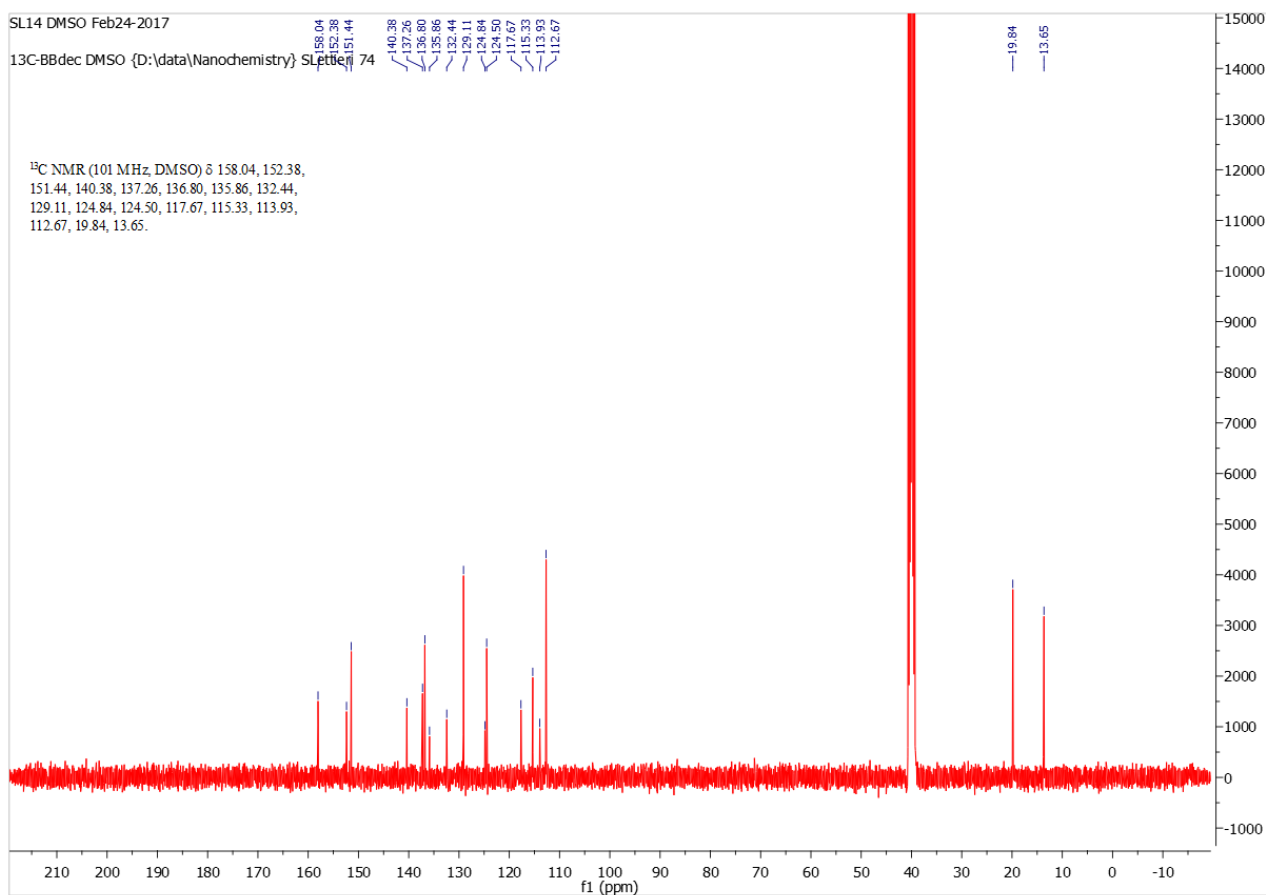

Figure S4:  $^{13}\text{C}$  NMR spectrum in DMSO- $d_6$  of BODIPY **3**.

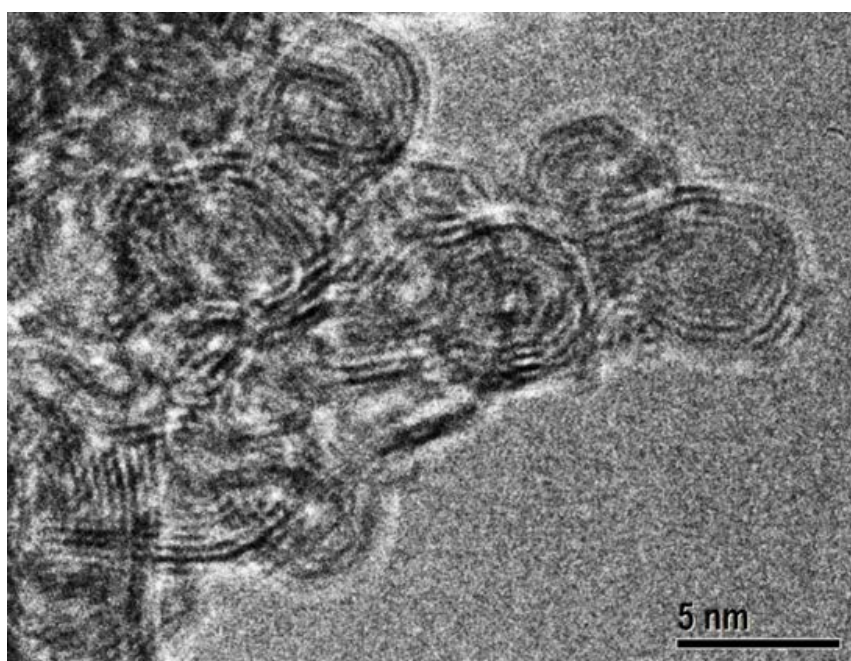

Figure S5: HR-TEM of p-CNOs.
